# Supplementary figures and images for: Structure of human phagocyte NADPH oxidase in the resting state
Source: eLife journal article supplement (doi:10.7554/elife.83743), 2022-11-22

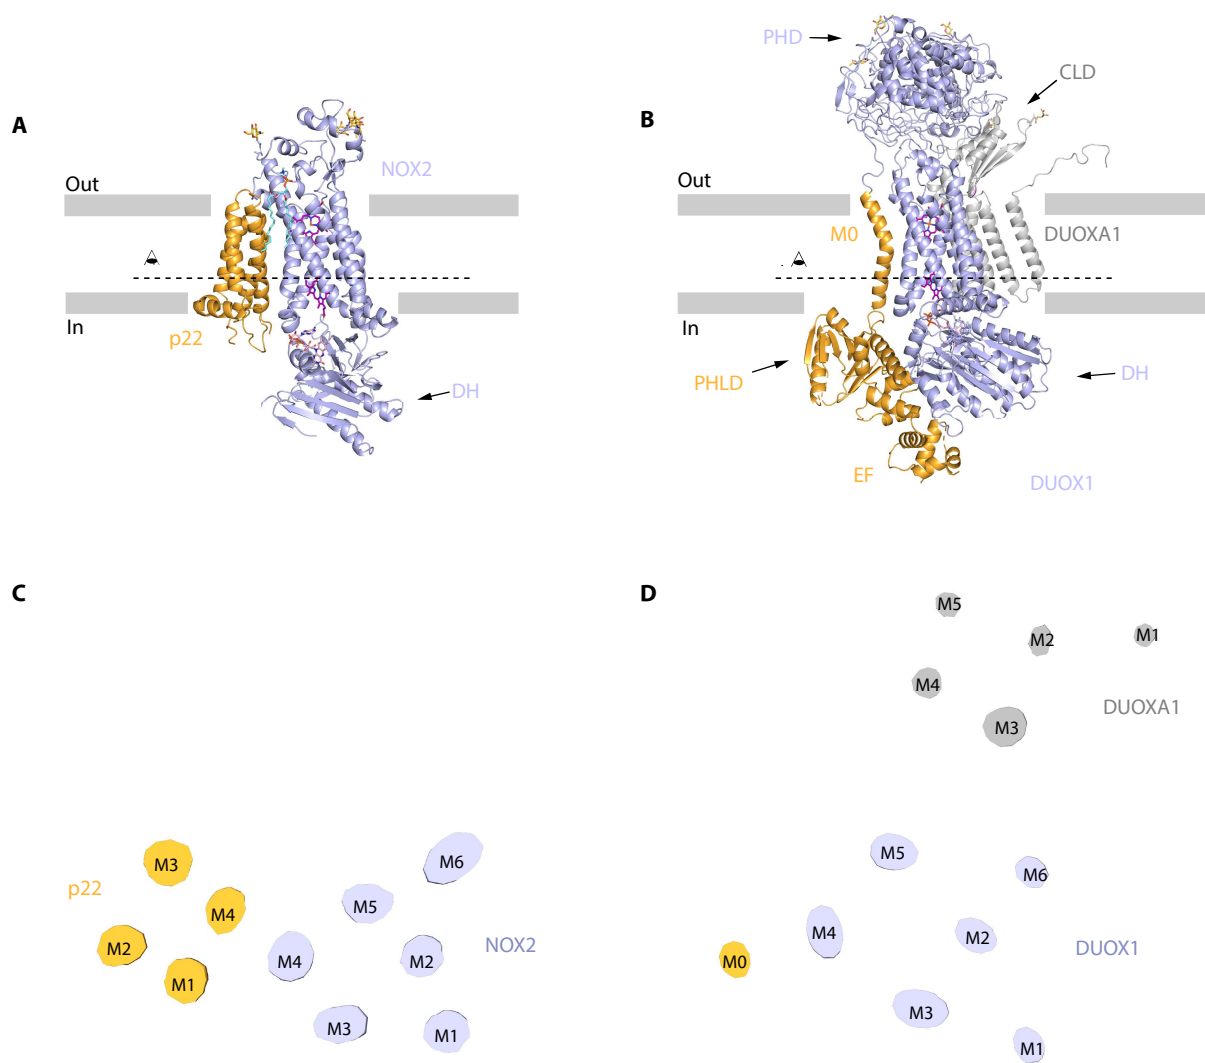

**Figure 6-figure supplement 1**

Supplement: supp [file elife-83743-supp-v1.zip]

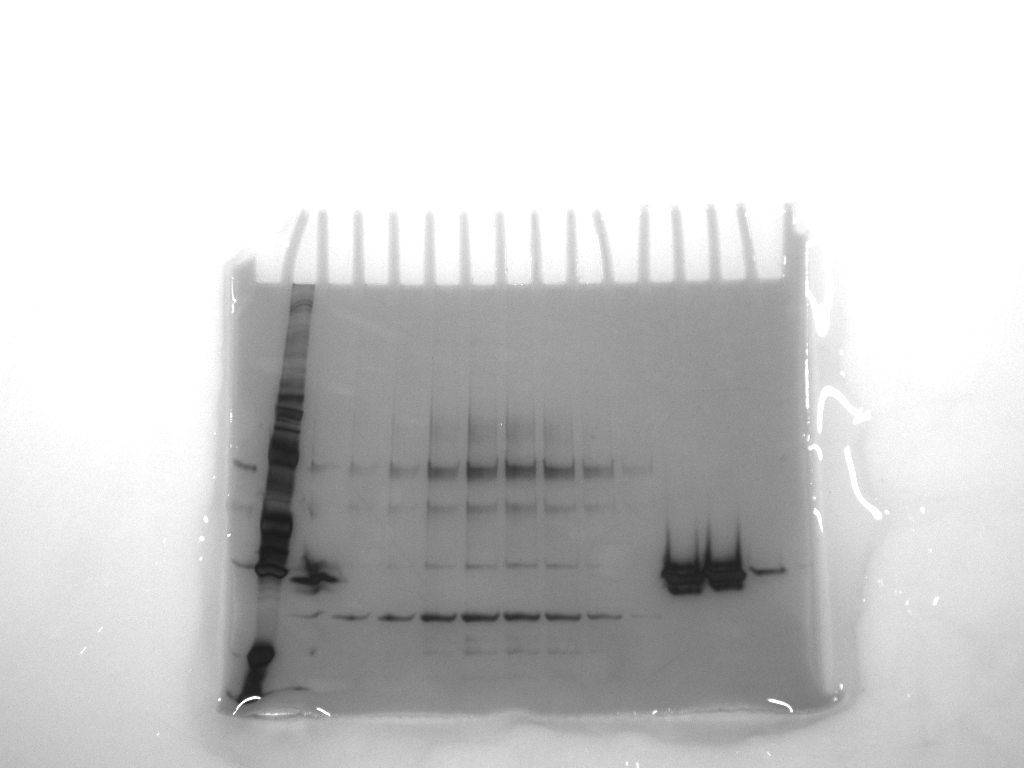

Supplement: supp [file full raw unedited gels.docx]

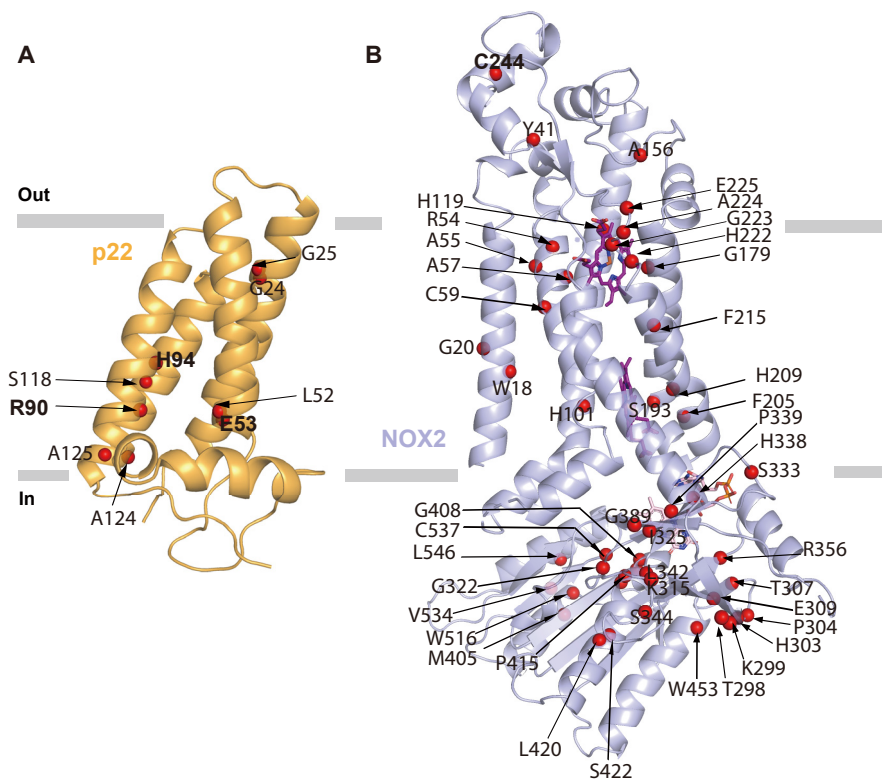

**Figure 1-figure supplement 7**

Supplement: supp [file elife-83743-supp-v1.zip]

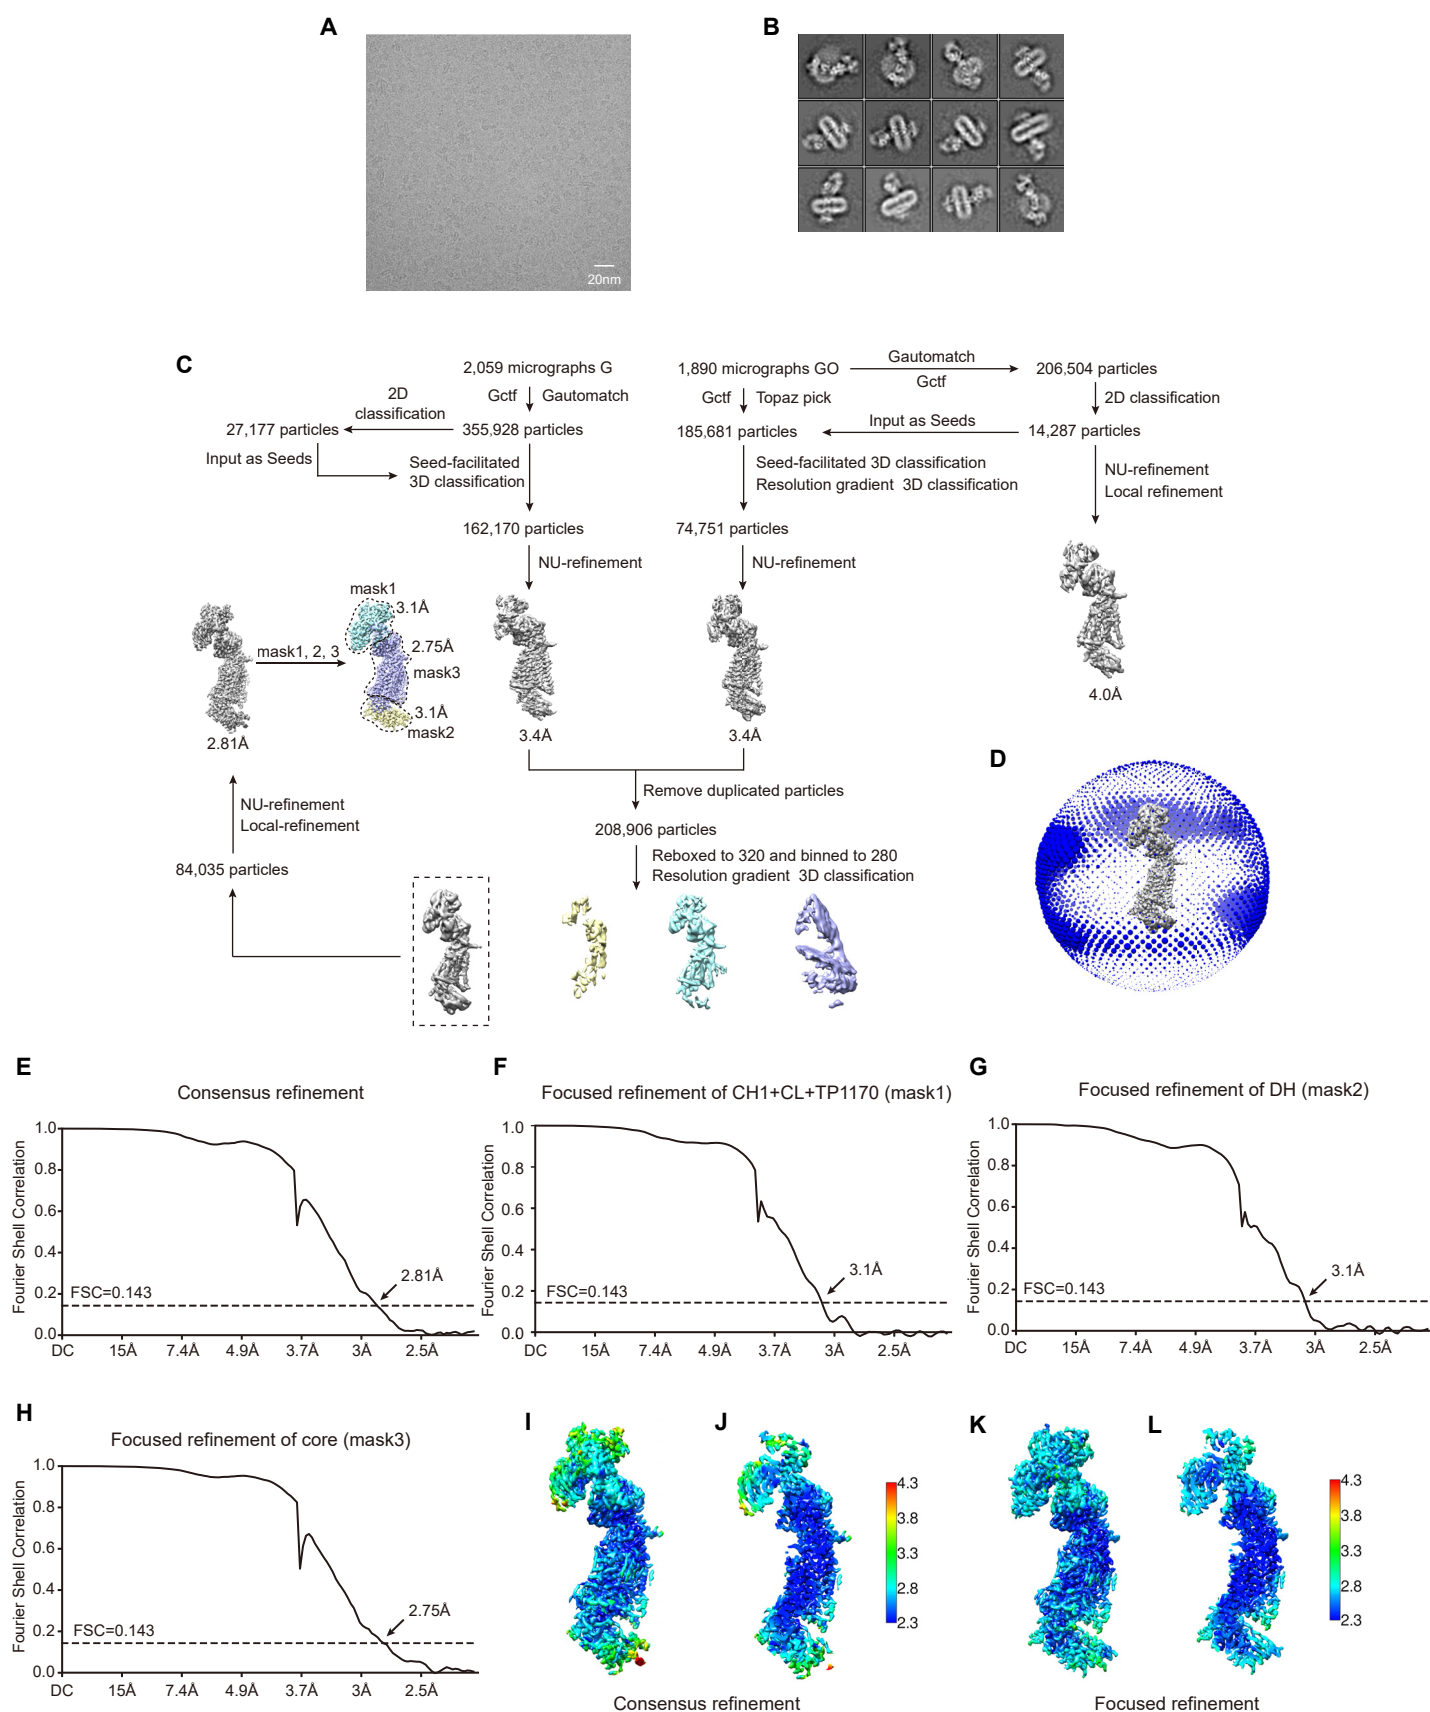

Figure 1-figure supplement 2

Supplement: supp [file elife-83743-supp-v1.zip]

**A**

8GZ3-NOX2  
8GZ3-p22  
7U8G  
RMSD=0.364Å

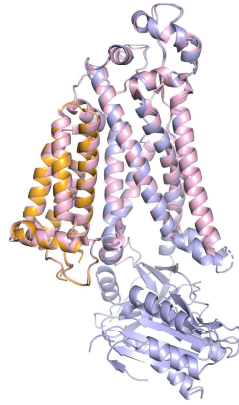

**B**

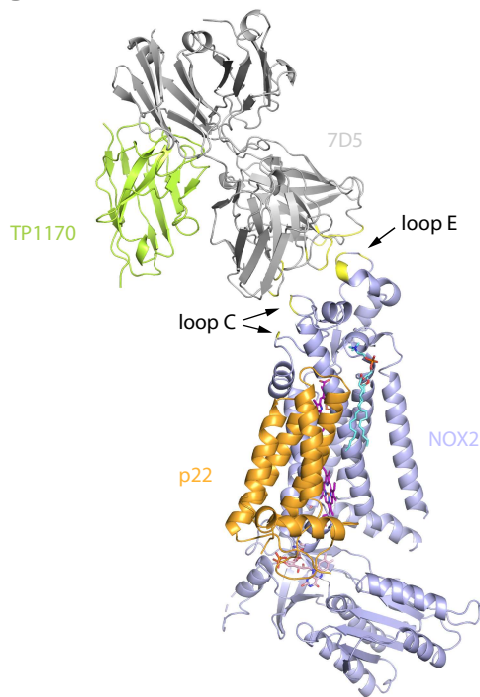

**C**

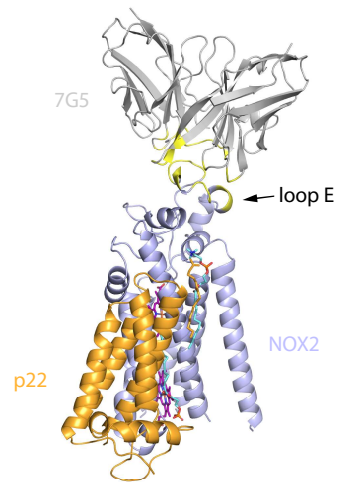

**Figure 6-figure supplement 2**

Supplement: supp [file elife-83743-supp-v1.zip]

## p22

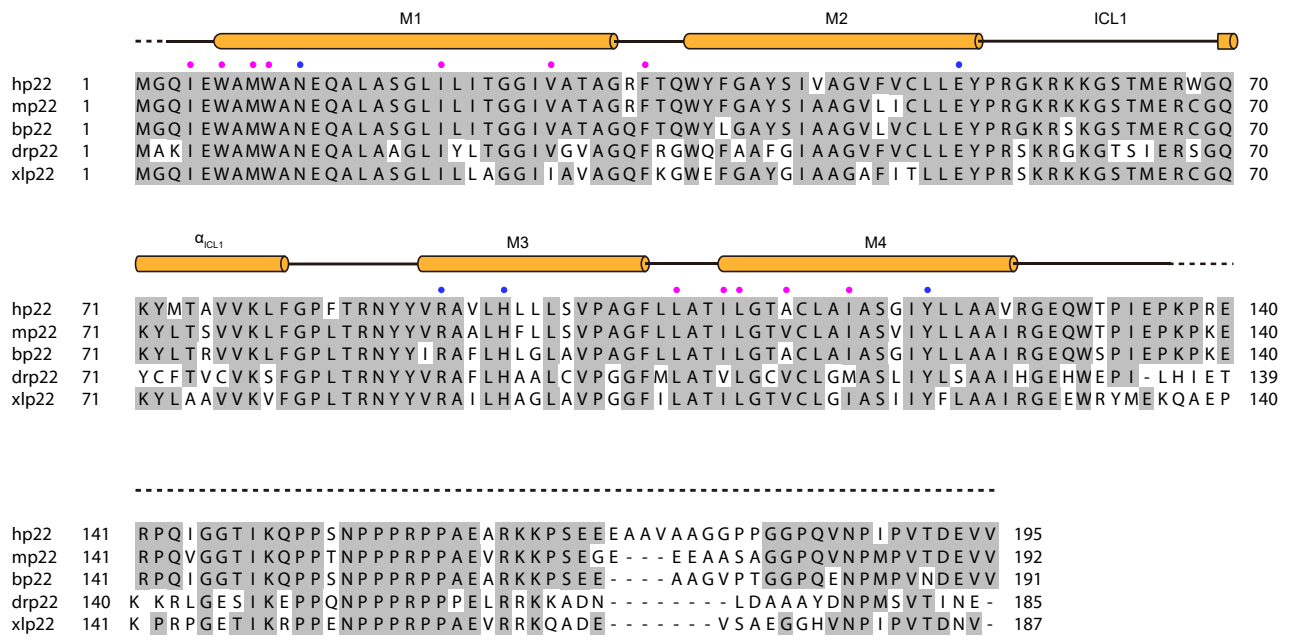

Figure 1-figure supplement 5

Supplement: supp [file elife-83743-supp-v1.zip]

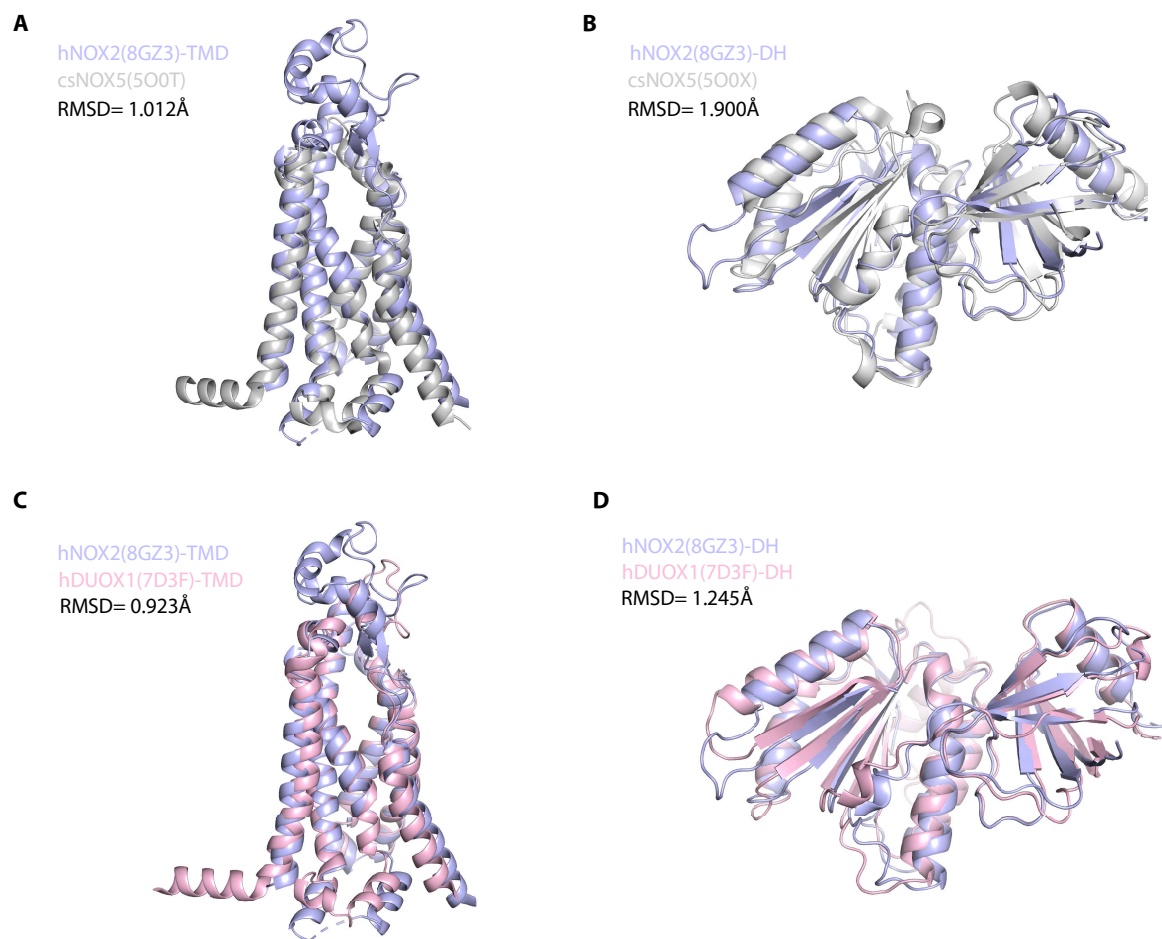

**Figure 1-figure supplement 6**

Supplement: supp [file elife-83743-supp-v1.zip]

# NOX

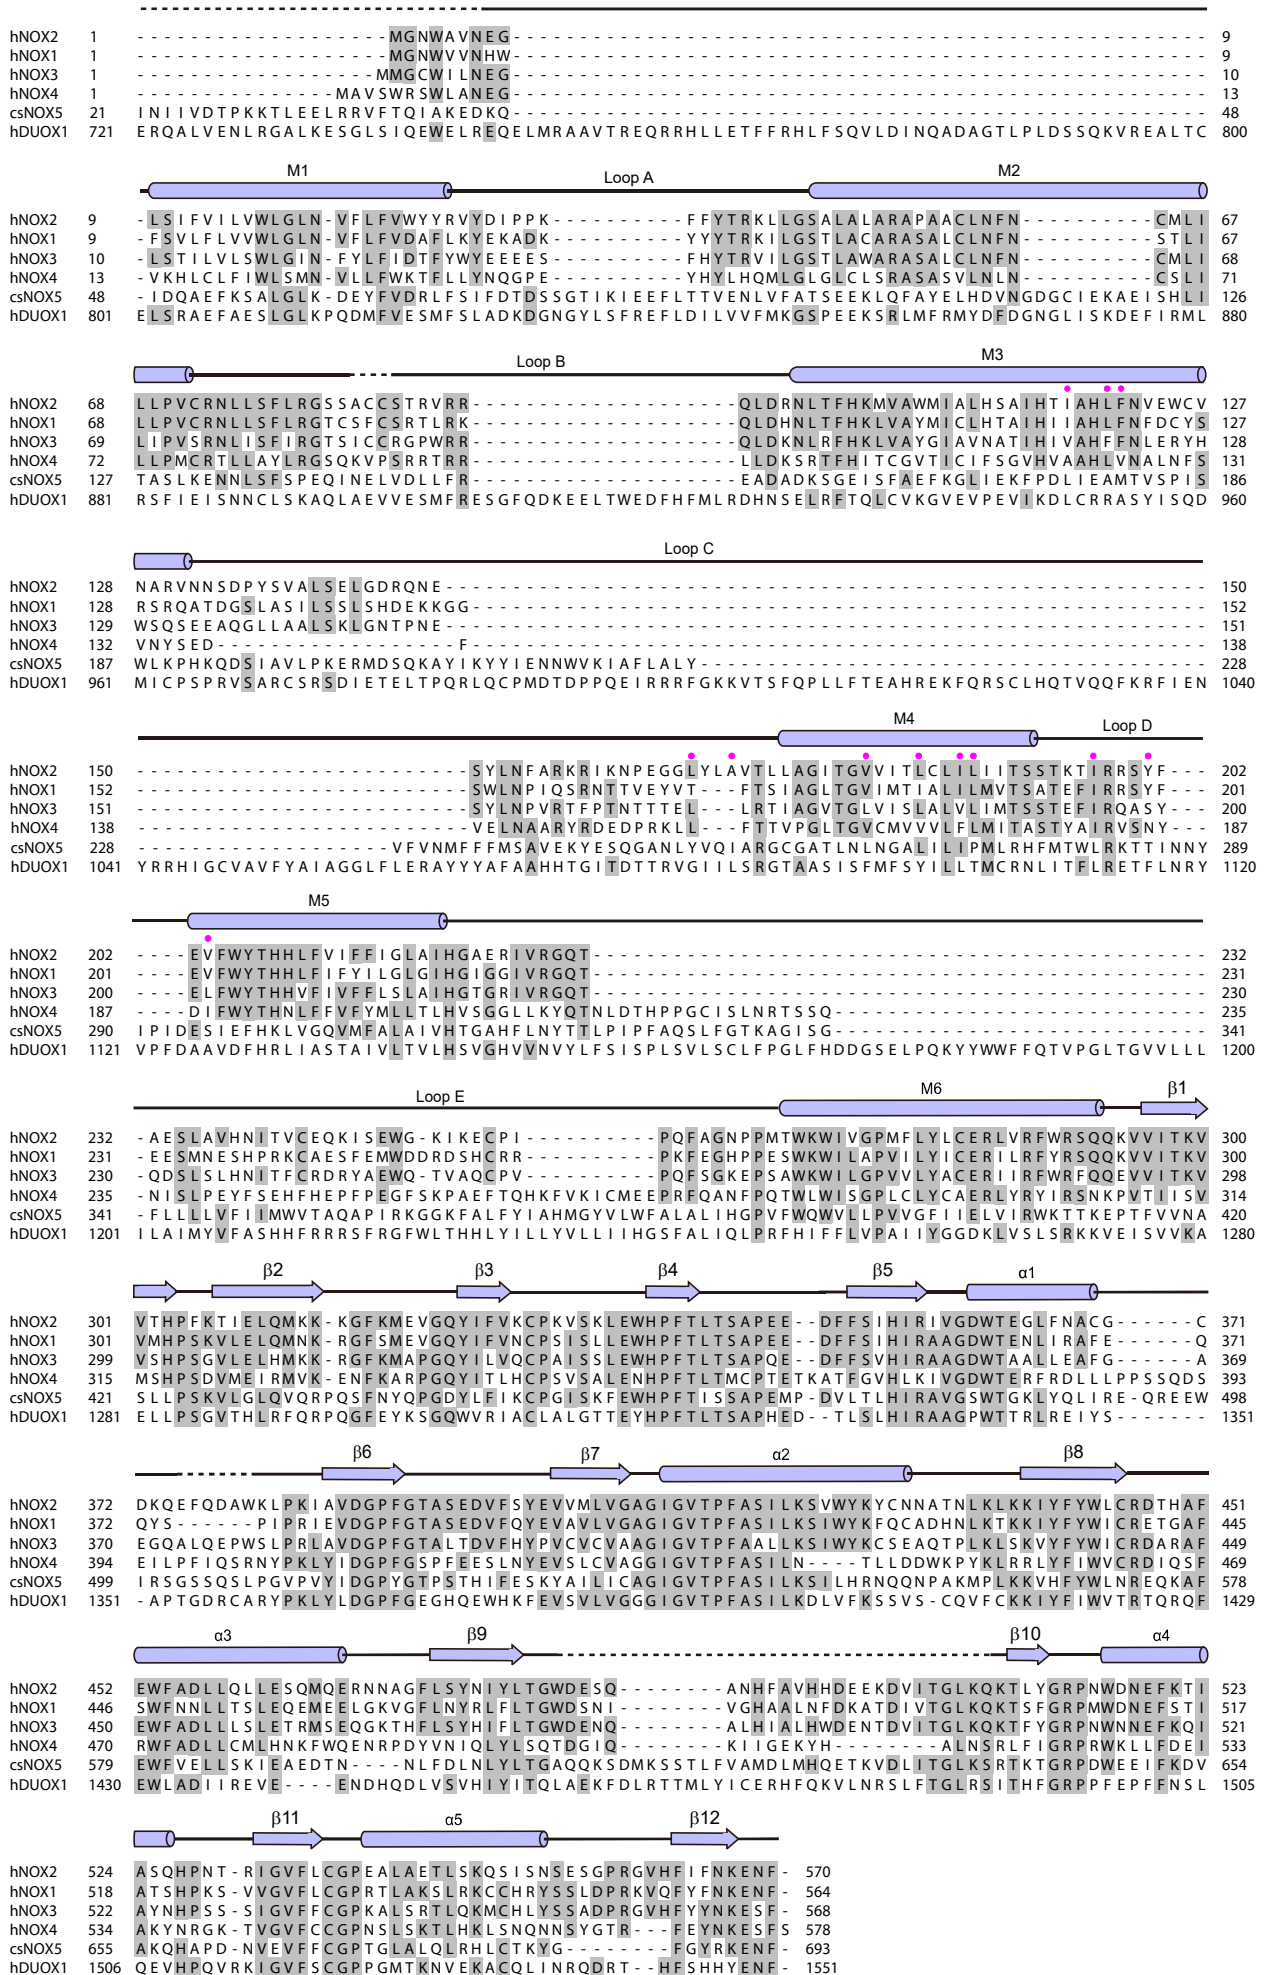

Figure 1-figure supplement 4

Supplement: supp [file elife-83743-supp-v1.zip]

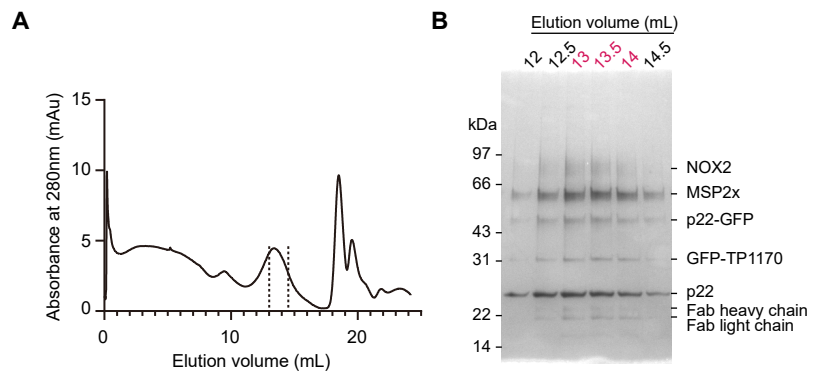

**Figure 1-figure supplement 1**

Supplement: supp [file elife-83743-supp-v1.zip]

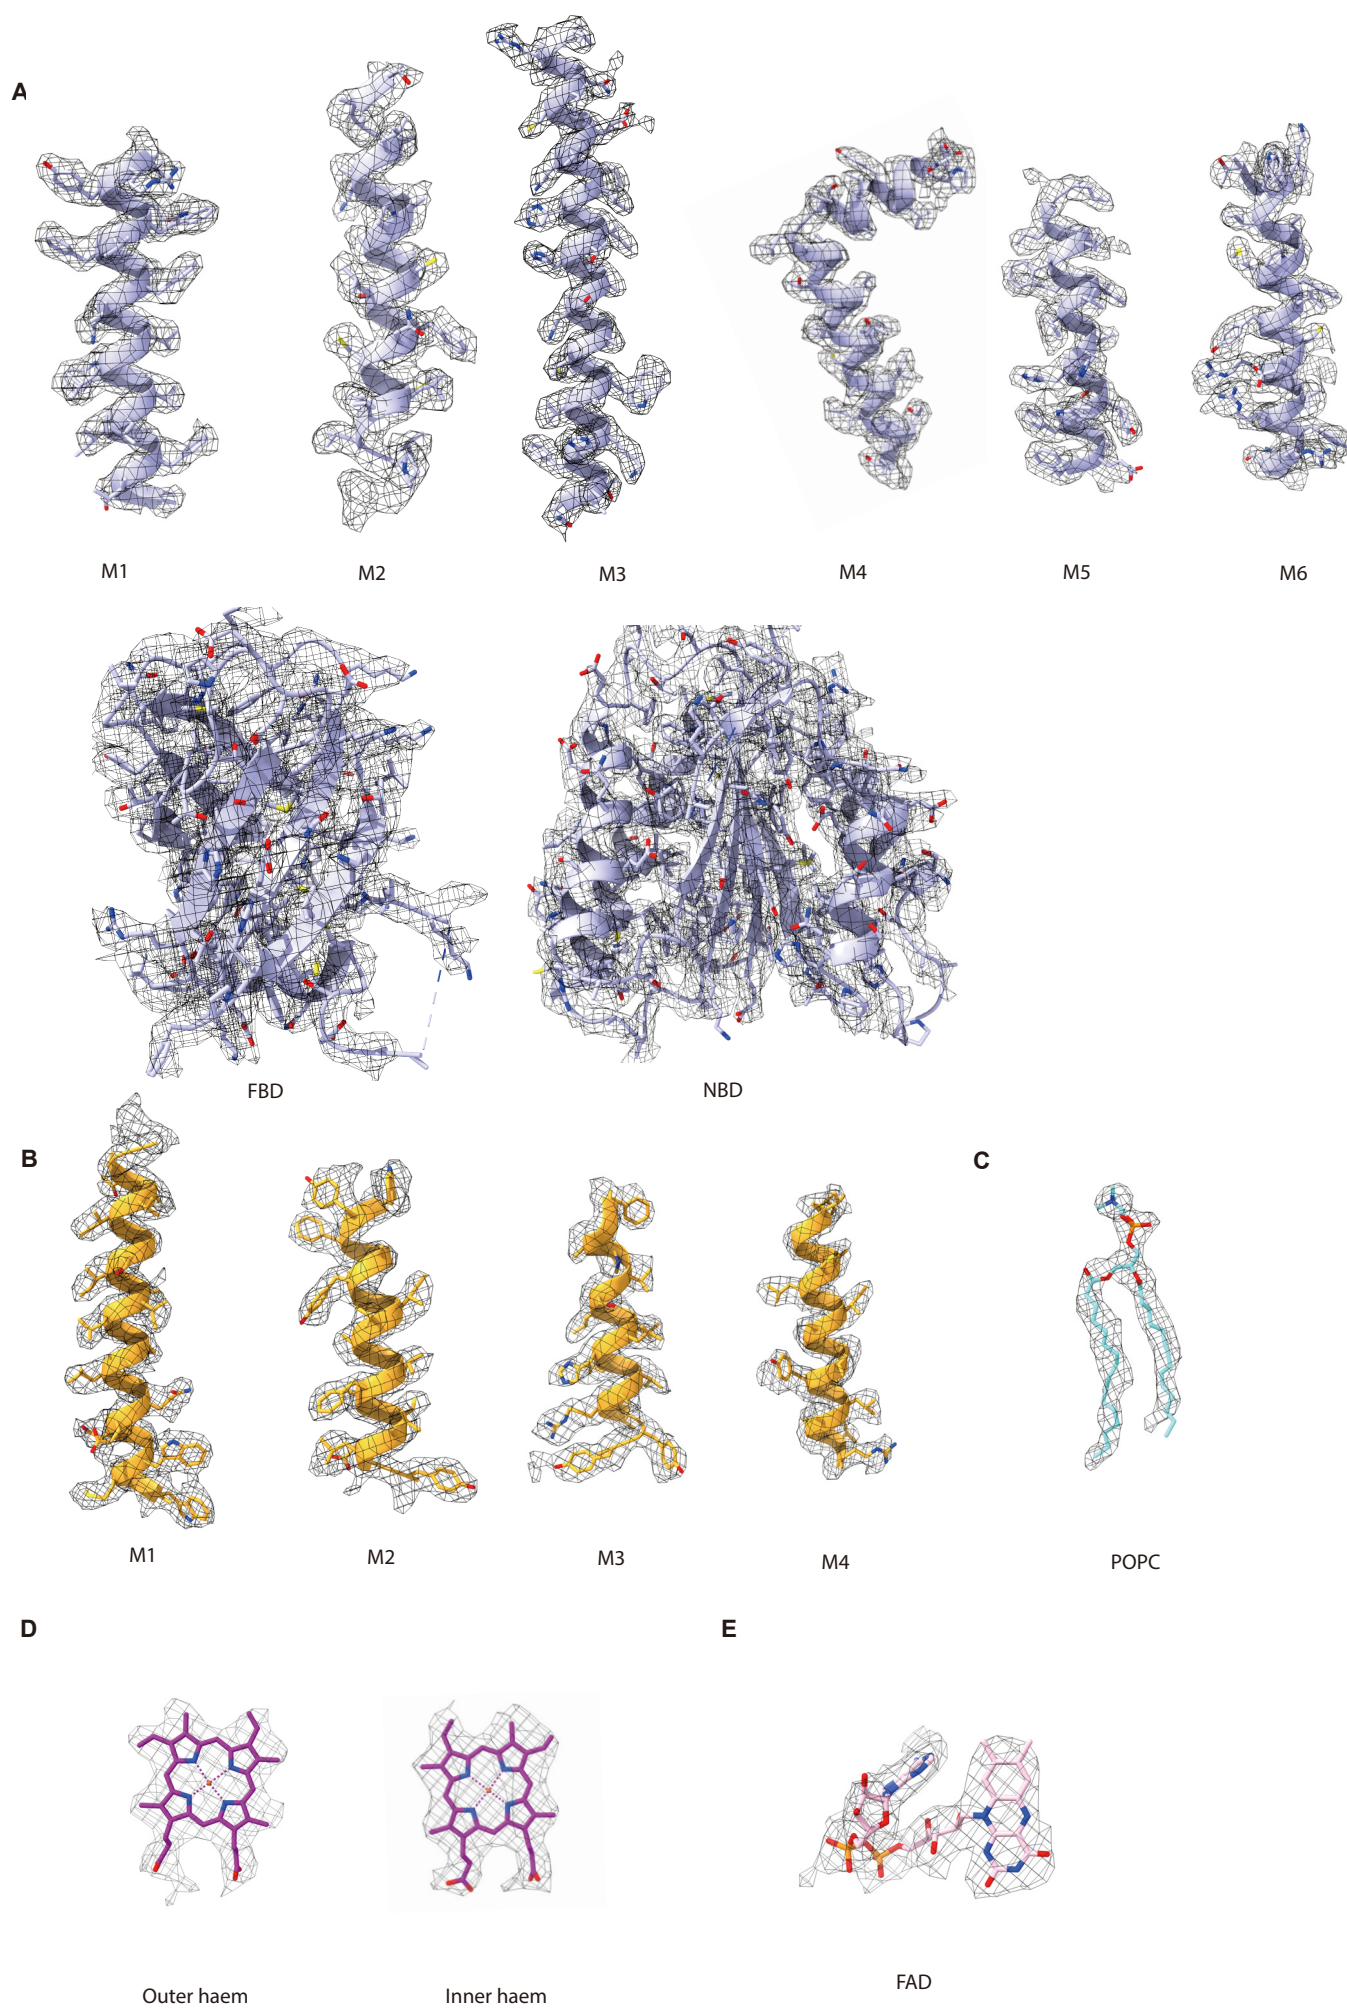

**Figure 1-figure supplement 3**

Supplement: supp [file elife-83743-supp-v1.zip]
